# Supplementary material for: NavBLIP: a visual-language model for enhancing unmanned aerial vehicles navigation and object detection
Source: Frontiers journal article supplement (doi:10.3389/fnbot.2024.1513354), 2025-01-24
Supplement: Data_Sheet_2.pdf [file Data_Sheet_2.pdf]

Model 1

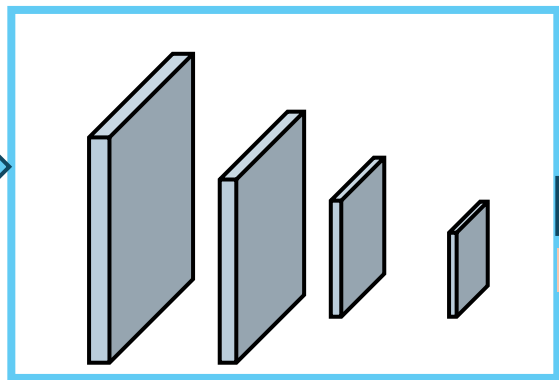

Cross Transfer Model

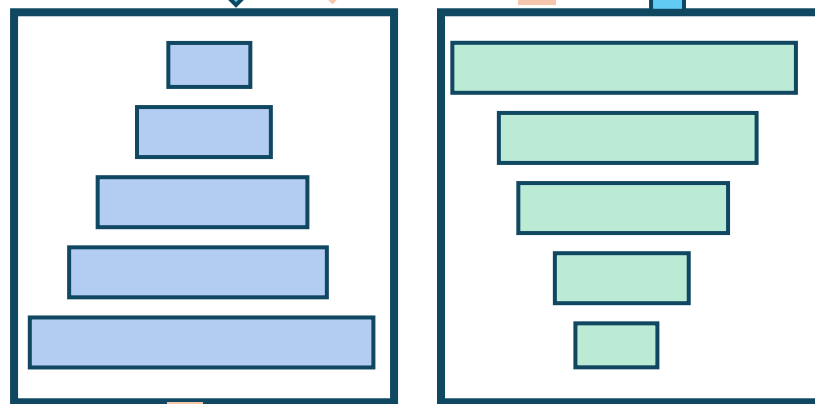

Model 2

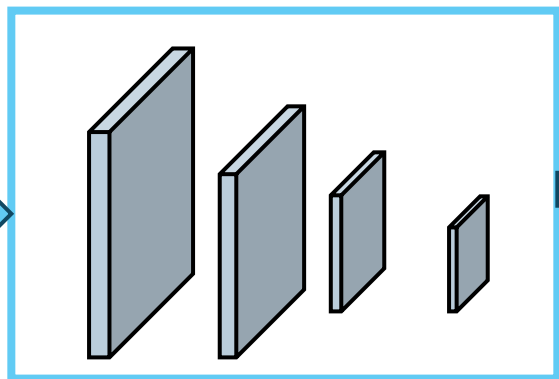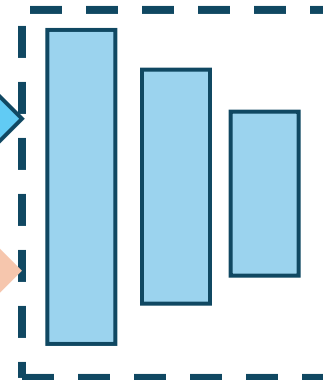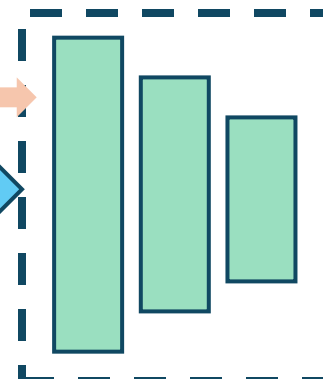

➡ Cross Transfer Passage

Information flow for different types of losses between models

┌ ┐ Trainable  
└ ┘  
┌ ┐ Pre-Trained  
└ ┘
